# Supplementary material
Source: PubMed Central journal article supplement (PMC5794343)
Supplement: NIHMS934572-supplement-Supplemental_Materials.pdf [file NIHMS934572-supplement-Supplemental_Materials.pdf]

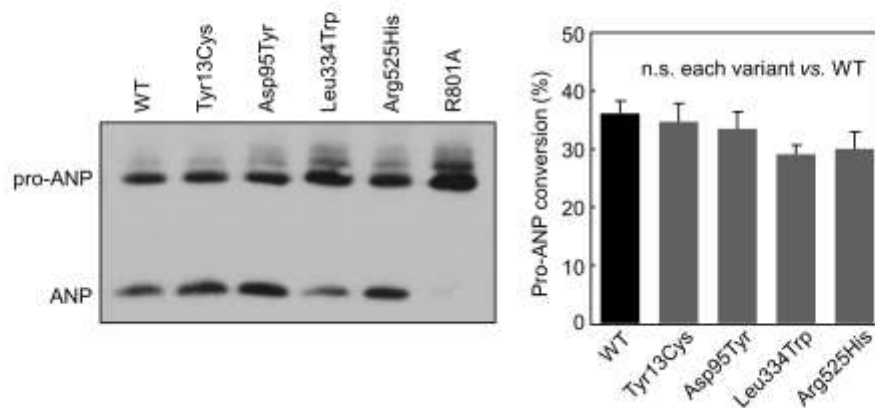

**Supp. Fig. S1.** Pro-ANP processing activity of p.Tyr13Cys, p.Asp95Tyr, p.Leu334Trp and p.Arg525His was analyzed by Western blotting. WT corin and inactive R801A mutant were used as positive and negative controls, respectively. Pro-ANP to ANP conversion was quantified. Data were from 3 independent experiments. n.s.: not significant vs. WT.

**Supplemental Table S1. Characteristics of participants in cohorts 1 and 2**

| Characteristics  | Cohort 1          |                         |                   | Cohort 2          |                         |                   |
|------------------|-------------------|-------------------------|-------------------|-------------------|-------------------------|-------------------|
|                  | Normal<br>(n=300) | Hypertensive<br>(n=401) | <i>p</i><br>value | Normal<br>(n=377) | Hypertensive<br>(n=368) | <i>p</i><br>value |
| Age (year)       | 39 ± 19           | 57 ± 14                 | <0.05             | 50 ± 10           | 54 ± 7                  | 0.13              |
| Male (%)         | 157 (52.3)        | 268 (66.8)              | <0.01             | 200 (53.1)        | 152 (41.3)              | 0.013             |
| SBP (mmHg)       | 108.2 ± 16.7      | 147.2 ± 5.9             | <0.01             | 111.6 ± 11.8      | 135.3 ± 10.1            | <0.01             |
| DBP (mmHg)       | 74.2 ± 8.6        | 93.6 ± 7.5              | <0.01             | 78.8 ± 3.6        | 97.8 ± 6.6              | <0.01             |
| Blood parameters |                   |                         |                   |                   |                         |                   |
| BG (mmol/L)      | 5.3 ± 0.7         | 5.3 ± 1.2               | 0.46              | 4.9 ± 0.8         | 5.4 ± 1.3               | 0.22              |
| TG (mmol/L)      | 3.8 ± 1.9         | 3.9 ± 2.6               | 0.79              | 3.6 ± 1.9         | 3.6 ± 3.3               | 0.83              |
| HDL (mmol/L)     | 1.5 ± 0.6         | 1.5 ± 0.5               | 0.56              | 1.4 ± 0.5         | 1.4 ± 0.6               | 0.68              |
| UA (µmol/L)      | 277.2 ± 56.4      | 348.3 ± 86.7            | 0.07              | 299.5 ± 76.3      | 312.6 ± 88.2            | 0.52              |
| Medical history  |                   |                         |                   |                   |                         |                   |
| HF               | 0 (0)             | 12 (2.9)                |                   | 0 (0)             | 13 (3.5)                |                   |
| Diabetes         | 0 (0)             | 22 (5.5)                |                   | 0 (0)             | 23 (6.3)                |                   |
| CVD              | 0 (0)             | 8 (2.0)                 |                   | 0 (0)             | 9 (2.4)                 |                   |
| RF               | 0 (0)             | 5 (1.2)                 |                   | 0 (0)             | 2 (0.5)                 |                   |

Data are mean ± S.D. In gender distribution, the number and percentage of males are indicated; SBP: systolic blood pressure; DBP: diastolic blood pressure; BG: blood glucose; TG: triglyceride; HDL: high density lipoprotein; UA: uric acid; HF: heart failure; CVD: cerebrovascular disease; RF: renal failure

**Supplemental Table S2. *CORIN* variant p.Arg530Ser in second independent cohort**

|                                                  | Normal |            | Hypertension |            | <i>p</i> value |
|--------------------------------------------------|--------|------------|--------------|------------|----------------|
|                                                  | Arg530 | Ser530 (%) | Arg530       | Ser530 (%) |                |
| Second cohort<br>(377 normal; 368 HP)            | 375    | 2 (0.53)   | 359          | 9 (2.44)   | 0.0327         |
| First and second cohorts<br>(677 normal; 769 HP) | 674    | 3 (0.47)   | 750          | 19 (2.47)  | 0.0029         |

HP: hypertensive individuals.

**Supplemental Table S3. Multivariate logistic regression analysis of hypertension association in cohorts 1 and 2**

|                 | p.Arg530Ser | Age and gender adjusted |                | Multivariable adjusted* |                |
|-----------------|-------------|-------------------------|----------------|-------------------------|----------------|
|                 |             | OR (95% CI)             | <i>p</i> value | OR (95% CI)             | <i>p</i> value |
| Cohort 1        | -           | 1.00 (reference)        | 0.060          | 1.00 (reference)        | 0.034          |
|                 | +           | 7.46 (0.92-60.56)       |                | 9.59 (1.03-89.35)       |                |
| Cohort 2        | -           | 1.00 (reference)        | 0.049          | 1.00 (reference)        | 0.028          |
|                 | +           | 4.72 (1.01-22.08)       |                | 5.86 (1.21-28.37)       |                |
| Cohorts 1 and 2 | -           | 1.00 (reference)        | 0.004          | 1.00 (reference)        | 0.002          |
|                 | +           | 6.09 (1.76-21.01)       |                | 7.40 (2.04-26.89)       |                |

\*Adjusted for age, blood glucose, cerebrovascular disease, gender, high density lipoprotein, heart failure, renal failure, triglyceride and uric acid. CI: confidence interval; OR: odds ratio.

**Supplemental Table S4. Multivariate logistic regression analysis of hypertension association in cohorts 1 and 2 (HF excluded)**

|                    | p.Arg530Ser | Age and gender adjusted<br>OR (95% CI) | <i>p</i> value | Multivariable adjusted*<br>OR (95% CI) | <i>p</i> value |
|--------------------|-------------|----------------------------------------|----------------|----------------------------------------|----------------|
| Cohort 1           | -           | 1.00 (reference)                       | 0.060          | 1.00 (reference)                       | 0.042          |
|                    | +           | 7.46 (0.92-60.64)                      |                | 10.13 (1.09-94.48)                     |                |
| Cohort 2           | -           | 1.00 (reference)                       | 0.062          | 1.00 (reference)                       | 0.04           |
|                    | +           | 4.22 (0.88-20.12)                      |                | 5.37 (1.08-26.65)                      |                |
| Cohorts 1<br>and 2 | -           | 1.00 (reference)                       | 0.004          | 1.00 (reference)                       | 0.002          |
|                    | +           | 6.06 (1.75-20.91)                      |                | 7.27 (2.02-26.19)                      |                |

\*Adjusted for age, blood glucose, cerebrovascular disease, gender, high density lipoprotein, renal failure, triglyceride and uric acid. CI: confidence interval; OR: odds ratio.

**Supplemental Table S5. Correlation analysis of hypertension and p.Arg530Ser in cohorts 1 and 2**

|                 | Pearson's correlation       |                | Partial correlation*        |                |
|-----------------|-----------------------------|----------------|-----------------------------|----------------|
|                 | Correlation coefficient (r) | <i>P</i> value | Correlation coefficient (r) | <i>p</i> value |
| Cohort 1        | 0.090                       | 0.022          | 0.097                       | 0.014          |
| Cohort 2        | 0.077                       | 0.036          | 0.088                       | 0.017          |
| Cohorts 1 and 2 | 0.083                       | 0.002          | 0.090                       | 0.001          |

\*Cardiovascular risk factors (high density lipoprotein and triglyceride) were used as confounding variables in the analysis.

**Supplemental Table S6. Corresponding *CORIN* variants in 1000G and ExAC databases**

| Variant            | Corresponding Variants |                 |
|--------------------|------------------------|-----------------|
|                    | 1000G                  | ExAC            |
| p.(Ser4ValfsTer26) | rs199972616            | 4:47839958 C/CT |
| p.(Tyr13Cys)       | rs2289433              | 4:47839929 C/T  |
| p.(Asp95Tyr)       | rs186748019            | 4:47788868 C/A  |
| p.(Leu334Trp)      | rs185899169            | 4:47685768 A/C  |
| p.(Arg349His)      | not found              | not found       |
| p.(Arg525His)      | rs11934749             | 4:47667064 T/C  |
| p.(Arg530Ser)      | not found              | not found       |
| p.(Pro866Ser)      | rs575717887            | 4:47605630 G/A  |
| p.(Thr924Met)      | rs532940795            | 4:47605455 G/A  |

1000Genomes (1000G) database: [www.internationalgenome.org](http://www.internationalgenome.org)

ExAC database: <http://exac.broadinstitute.org>

**Supplemental Table S7. CORIN variant frequencies in 1000G and ExAC databases**

| Variant            | Normal in cohort 1<br>n (%) | 1000Genomes       |            | ExAC               |            |
|--------------------|-----------------------------|-------------------|------------|--------------------|------------|
|                    |                             | n (%)             | <i>p</i> * | n (%)              | <i>p</i> * |
| p.(Ser4ValfsTer26) | 2/300 (0.7)                 | 15/2504 (0.6)     | 0.70       | 124/60621 (0.2)    | 0.13       |
| p.(Tyr13Cys)       | 153/300 (51)                | 1284 /2504 (51.3) | 0.93       | 27399/60689 (45.1) | 0.04       |
| p.(Asp95Tyr)       | 2/300 (0.7)                 | 14/2504 (0.56)    | 0.69       | 55/60419 (0.09)    | 0.03       |
| p.(Leu334Trp)      | 3/300 (1)                   | 3/2504 (0.12)     | 0.02       | 46/60593 (0.08)    | 0.002      |
| p.(Arg349His)      | 0/300 (0)                   | -                 | -          | -                  | -          |
| p.(Arg525His)      | 109/300 (36.3)              | 413/2504 (16.5)   | <0.001     | 13788/60581 (22.8) | <0.001     |
| p.(Arg530Ser)      | 1/300 (0.3)                 | -                 | -          | -                  | -          |
| p.(Pro866Ser)      | 0/300 (0)                   | 1/2504 (0.04)     | 1          | 20/60594 (0.03)    | 1          |
| p.(Thr924Met)      | 0/300 (0)                   | 2/2504 (0.08)     | 1          | 7/60639 (0.01)     | 1          |

n: number of individuals; \**p* values vs. normal in cohort 1 by Chi-Test
